# Supplementary material for: Molecular composition of fresh and aged aerosols from residential wood combustion and gasoline car with modern emission mitigation technology
Source: Royal Society of Chemistry journal article supplement (doi:10.1039/d4em00106k), 2024-01-01
Supplement: d4em00106k1.pdf [file d4em00106k1.pdf]

## Supporting Information

### **Molecular Composition of Fresh and Aged Aerosols from Residential Wood Combustion and Gasoline Car with Modern Emission Mitigation Technology**

Eric Schneider<sup>a,b</sup>, Hendryk Czech<sup>a,c,\*</sup>, Anni Hartikainen<sup>d</sup>, Helly J. Hansen<sup>a</sup>, Nadine Gawlitta<sup>c</sup>, Mika Ihalainen<sup>d</sup>, Pasi Yli-Pirilä<sup>d</sup>, Markus Somero<sup>d</sup>, Miika Kortelainen<sup>d</sup>, Juho Louhisalmi<sup>d</sup>, Jürgen Orasche<sup>c</sup>, Zheng Fang<sup>e</sup>, Yinon Rudich<sup>e</sup>, Olli Sippula<sup>d,f</sup>, Christopher P. Rüger<sup>a,b</sup> and Ralf Zimmermann<sup>a,b,c</sup>

<sup>a</sup>Joint Mass Spectrometry Centre, Department of Analytical and Technical Chemistry, University of Rostock, Rostock, Germany

<sup>b</sup>Department Life, Light & Matter (LL&M), University of Rostock, Rostock, Germany

<sup>c</sup>Joint Mass Spectrometry Centre, Cooperation Group “Comprehensive Molecular Analytics” (CMA), Helmholtz Centre Munich, Munich, Germany

<sup>d</sup>Department of Environmental and Biological Sciences, University of Eastern Finland, Kuopio, Finland

<sup>e</sup>Department of Earth and Planetary Sciences, Weizmann Institute of Science, Rehovot, Israel

<sup>f</sup>Department of Chemistry, University of Eastern Finland, Joensuu, Finland

Corresponding author email: Hendryk Czech (hendryk.czech@uni-rostock.de)

## **Table of contents**

|                                                                                                                                                                                                         |            |
|---------------------------------------------------------------------------------------------------------------------------------------------------------------------------------------------------------|------------|
| <b>Section S1.</b> Calculation of molecular properties                                                                                                                                                  | <b>S3</b>  |
| <b>Table S1:</b> Compound classes and their respective $n^{\circ}_C$ and $b$ values                                                                                                                     | <b>S3</b>  |
| <b>Table S2:</b> Absolute number of assigned elemental compositions in each compound class.                                                                                                             | <b>S4</b>  |
| <b>Table S3:</b> Absolute intensity of assigned elemental compositions in each compound class.                                                                                                          | <b>S5</b>  |
| <b>Table S4:</b> Arithmetic mean of parameters for each dataset.                                                                                                                                        | <b>S6</b>  |
| <b>Figure S1:</b> OH exposure during the experiments, assessed from the consumption of externally input d9-butanol.                                                                                     | <b>S7</b>  |
| <b>Figure S2:</b> Ratio of photolysis ( $F_{254, \text{exp}}$ ) to OH exposure ( $\text{OH}_{\text{exp}}$ ) during the experiments                                                                      | <b>S7</b>  |
| <b>Figure S3:</b> Examples of LVOC lifetimes regarding the particulate condensation sinks (Taer) downstream the PEAR                                                                                    | <b>S8</b>  |
| <b>Figure S4:</b> Upset plots of assigned elemental compositions from fresh, short aged and medium aged residential wood combustion emissions                                                           | <b>S9</b>  |
| <b>Figure S5:</b> Overview of total assigned mass spectra of each emission source (gasoline car, wood combustion) and intensity of photochemical aging                                                  | <b>S10</b> |
| <b>Figure S6:</b> Van Krevelen diagrams of residential wood combustion emissions                                                                                                                        | <b>S11</b> |
| <b>Figure S7:</b> Contour plot of double bond equivalent versus carbon number plot of the CHO and CHOS compound class                                                                                   | <b>S12</b> |
| <b>Figure S8:</b> Upset plots of assigned elemental compositions from fresh and short aged residential wood combustion emissions with optional application of an electrostatic precipitator             | <b>S13</b> |
| <b>Figure S9:</b> Upset plot of short aged wood combustion emissions (ESI-) with and without application of an electrostatic precipitator (ESP)                                                         | <b>S14</b> |
| <b>Figure S10:</b> Average carbon oxidation state (OSC) versus saturation vapor pressure ( $\log(C^*)$ ) plots of gasoline car and residential wood combustion emissions separated by ionization method | <b>S15</b> |
| <b>Figure S11:</b> Upset plots of assigned elemental compositions from fresh, short aged and medium aged gasoline car emissions                                                                         | <b>S16</b> |
| <b>Figure S12:</b> Distribution of compound classes (number) in separated volatility bins ( $\log(C^*)$ ) for each ionization technique, emission source and intensity of photochemical aging           | <b>S17</b> |
| <b>Figure S13:</b> Mass spectra (ESI-) of assigned sulfur-containing elemental compositions (CHOS: green, CHNOS: orange) in fresh, short aged and medium aged gasoline car emissions.                   | <b>S18</b> |
| <b>Figure S14:</b> Upset plots of the comparison of gasoline car and residential wood combustion emission aging after a) short and b) medium aging                                                      | <b>S19</b> |

## Section S1. Calculation of molecular properties

Formulae applied for the calculation of double bond equivalents (DBE), aromaticity index (AI, modified for high oxygen content),<sup>1,2</sup> saturation vapour pressure ( $C^*$ , Table S1).<sup>3</sup> Calculations are based on the assigned neutral sum formulae  $C_cH_hN_nO_oS_s$ .

$$DBE = c - \frac{h}{2} + \frac{n}{2} + 1 \quad (1)$$

$$AI_{mod} = \frac{1+c-0.5\ o-s-0.5\ h}{c-0.5\ o-s-n} \quad (2)$$

$AI_{mod} > 0.5$  indicates aromatic structures and  $AI_{mod} > 0.67$  indicates condensed aromatic structures.

$$\log_{10} C^* = (n_c^0 - c)b_c - ob_o - 2 \frac{c\ o}{c+o} b_{co} - nb_n - sb_s \quad (3)$$

Organic aerosol compounds can be classified into five groups, based on their saturation vapor pressure ( $C^*$ ): volatile organic compounds (VOC;  $C^* > 3 \times 10^6 \mu\text{g m}^{-3}$ ), intermediate volatility OC (IVOC;  $300 < C^* < 3 \times 10^6 \mu\text{g m}^{-3}$ ), semi volatile OC (SVOC;  $0.3 < C^* < 300 \mu\text{g m}^{-3}$ ), low-volatile OC (LVOC;  $3 \times 10^{-4} < C^* < 0.3 \mu\text{g m}^{-3}$ ), and extremely low-volatile OC (ELVOC;  $C^* < 3 \times 10^{-4} \mu\text{g m}^{-3}$ ).<sup>4,5</sup>

**Table S1:** Compound classes and their respective  $n_c^0$  and  $b$  values from Li et al.<sup>3</sup> obtained by least-squares optimization using compounds from the NCI database.

| Compound class | $n_c^0$ | $b_c$  | $b_o$  | $b_{co}$ | $b_n$  | $b_s$  |
|----------------|---------|--------|--------|----------|--------|--------|
| CH             | 23.8    | 0.4861 |        |          |        |        |
| CHO            | 22.66   | 0.4481 | 1.656  | -0.7790  |        |        |
| CHN            | 24.59   | 0.4066 |        |          | 0.9619 |        |
| CHNO           | 24.13   | 0.3667 | 0.7732 | -0.07790 | 1.114  |        |
| CHOS           | 24.06   | 0.3637 | 1.327  | -0.3988  |        | 0.7579 |
| CHNOS          | 28.5    | 0.3848 | 1.011  | 0.2921   | 1.053  | 1.316  |

**Table S2:** Absolute number of assigned elemental compositions in each compound class.

| ionization   | sample         | number of assigned compounds |      |      |      |       |     |
|--------------|----------------|------------------------------|------|------|------|-------|-----|
|              |                | CH                           | CHO  | CHNO | CHOS | CHNOS | CHN |
| APPI         | Car fresh      | 56                           | 513  | 51   | 0    | 0     | 0   |
|              | Car short      | 26                           | 450  | 1161 | 0    | 0     | 0   |
|              | Car medium     | 79                           | 800  | 2861 | 5    | 0     | 18  |
|              | Wood fresh     | 156                          | 750  | 207  | 0    | 0     | 22  |
|              | Wood short     | 109                          | 1160 | 848  | 0    | 0     | 10  |
|              | Wood medium    | 63                           | 1328 | 1426 | 0    | 0     | 7   |
|              | ESP Wood fresh | 181                          | 1031 | 466  | 0    | 0     | 40  |
|              | ESP Wood short | 67                           | 844  | 695  | 0    | 0     | 8   |
| ESI negative | Car fresh      | 0                            | 214  | 97   | 46   | 9     | 0   |
|              | Car short      | 0                            | 361  | 1078 | 6    | 109   | 0   |
|              | Car medium     | 0                            | 621  | 2227 | 120  | 390   | 0   |
|              | Wood fresh     | 0                            | 666  | 272  | 93   | 18    | 0   |
|              | Wood short     | 0                            | 962  | 1469 | 123  | 60    | 0   |
|              | Wood medium    | 0                            | 942  | 940  | 158  | 10    | 0   |
|              | ESP Wood fresh | 0                            | 551  | 543  | 128  | 55    | 0   |
|              | ESP Wood short | 0                            | 943  | 1520 | 112  | 128   | 0   |
| ESI positive | Car fresh      | 0                            | 580  | 202  | 0    | 0     | 15  |
|              | Car short      | 0                            | 388  | 1328 | 0    | 0     | 5   |
|              | Car medium     | 30                           | 643  | 401  | 0    | 0     | 51  |
|              | Wood fresh     | 19                           | 318  | 112  | 0    | 0     | 5   |
|              | Wood short     | 8                            | 867  | 771  | 0    | 0     | 26  |
|              | Wood medium    | 0                            | 844  | 857  | 0    | 0     | 13  |
|              | ESP Wood fresh | 21                           | 718  | 785  | 0    | 0     | 54  |
|              | ESP Wood short | 0                            | 718  | 916  | 0    | 0     | 20  |

ESP: electrostatic precipitator

**Table S3:** Absolute intensity of assigned elemental compositions in each compound class.

| ionization   | sample         | intensity of assigned compounds [a.u.] |          |          |          |          |          | total    |
|--------------|----------------|----------------------------------------|----------|----------|----------|----------|----------|----------|
|              |                | CH                                     | CHO      | CHNO     | CHOS     | CHNOS    | CHN      |          |
| APPI         | Car fresh      | 1.20E+09                               | 6.55E+09 | 6.93E+08 | 0        | 0        | 0        | 8.44E+09 |
|              | Car short      | 1.33E+08                               | 1.58E+09 | 4.70E+09 | 0        | 0        | 0        | 6.41E+09 |
|              | Car medium     | 2.39E+08                               | 3.74E+09 | 2.29E+10 | 3.98E+07 | 0        | 6.88E+07 | 2.71E+10 |
|              | Wood fresh     | 2.94E+09                               | 1.85E+10 | 8.96E+08 | 0        | 0        | 1.52E+08 | 2.25E+10 |
|              | Wood short     | 1.30E+09                               | 1.59E+10 | 4.19E+09 | 0        | 0        | 4.71E+07 | 2.15E+10 |
|              | Wood medium    | 3.86E+08                               | 1.90E+10 | 1.04E+10 | 0        | 0        | 2.65E+07 | 2.98E+10 |
|              | ESP Wood fresh | 5.28E+09                               | 2.81E+10 | 2.36E+09 | 0        | 0        | 2.33E+08 | 3.60E+10 |
|              | ESP Wood short | 2.71E+08                               | 7.11E+09 | 2.58E+09 | 0        | 0        | 2.24E+07 | 9.99E+09 |
| ESI negative | Car fresh      | 0                                      | 5.07E+09 | 5.49E+08 | 1.34E+09 | 4.50E+07 | 0        | 7.00E+09 |
|              | Car short      | 0                                      | 1.72E+09 | 4.86E+09 | 1.02E+07 | 2.98E+08 | 0        | 6.89E+09 |
|              | Car medium     | 0                                      | 5.48E+09 | 1.60E+10 | 3.80E+08 | 1.28E+09 | 0        | 2.31E+10 |
|              | Wood fresh     | 0                                      | 5.10E+09 | 1.00E+09 | 6.48E+08 | 9.96E+07 | 0        | 6.86E+09 |
|              | Wood short     | 0                                      | 7.47E+09 | 9.23E+09 | 4.15E+08 | 1.76E+08 | 0        | 1.73E+10 |
|              | Wood medium    | 0                                      | 6.80E+09 | 4.47E+09 | 4.83E+08 | 2.01E+07 | 0        | 1.18E+10 |
|              | ESP Wood fresh | 0                                      | 1.40E+10 | 2.24E+09 | 7.86E+08 | 1.95E+08 | 0        | 1.72E+10 |
|              | ESP Wood short | 0                                      | 6.25E+09 | 9.01E+09 | 3.91E+08 | 4.18E+08 | 0        | 1.61E+10 |
| ESI positive | Car fresh      | 0                                      | 3.55E+09 | 1.21E+09 | 0        | 0        | 5.67E+07 | 4.81E+09 |
|              | Car short      | 0                                      | 1.27E+09 | 5.02E+09 | 0        | 0        | 1.11E+07 | 6.30E+09 |
|              | Car medium     | 4.76E+07                               | 2.39E+09 | 1.02E+09 | 0        | 0        | 1.67E+08 | 3.63E+09 |
|              | Wood fresh     | 4.75E+07                               | 1.34E+09 | 4.92E+08 | 0        | 0        | 5.48E+07 | 1.94E+09 |
|              | Wood short     | 4.99E+07                               | 3.66E+09 | 3.76E+09 | 0        | 0        | 9.92E+07 | 7.57E+09 |
|              | Wood medium    | 0                                      | 3.12E+09 | 4.61E+09 | 0        | 0        | 4.42E+07 | 7.78E+09 |
|              | ESP Wood fresh | 6.41E+07                               | 4.29E+09 | 4.56E+09 | 0        | 0        | 2.34E+08 | 9.15E+09 |
|              | ESP Wood short | 0                                      | 2.38E+09 | 4.23E+09 | 0        | 0        | 6.10E+07 | 6.67E+09 |

ESP: electrostatic precipitator

**Table S4:** Arithmetic mean of parameters calculated from the elemental composition for each dataset.

| ionization   | sample         | number | OS <sub>c</sub> | DBE  | AI <sub>mod</sub> | H/C  | O/C  | O/N  | C    | H    | N   | O    | m/z   |
|--------------|----------------|--------|-----------------|------|-------------------|------|------|------|------|------|-----|------|-------|
| APPI         | Car fresh      | 620    | -1.12           | 6.9  | 0.31              | 1.40 | 0.15 | 2.86 | 21.8 | 31.8 | 0.1 | 2.7  | 338.6 |
|              | Car short      | 1637   | -0.59           | 5.9  | 0.22              | 1.39 | 0.41 | 4.11 | 14.8 | 20.9 | 1.1 | 5.0  | 296.3 |
|              | Car medium     | 3784   | -0.55           | 6.3  | 0.21              | 1.39 | 0.43 | 4.14 | 15.5 | 21.8 | 1.4 | 5.7  | 320.8 |
|              | Wood fresh     | 1135   | -0.62           | 12.9 | 0.59              | 0.87 | 0.15 | 2.51 | 21.1 | 18.8 | 0.2 | 2.3  | 313.5 |
|              | Wood short     | 2127   | -0.42           | 12.5 | 0.55              | 0.91 | 0.26 | 4.66 | 20.0 | 17.6 | 0.4 | 4.1  | 331.1 |
|              | Wood medium    | 2824   | -0.26           | 12.6 | 0.53              | 0.90 | 0.33 | 5.62 | 19.7 | 16.7 | 0.6 | 5.5  | 349.4 |
|              | ESP Wood fresh | 1718   | -0.64           | 13.5 | 0.57              | 0.90 | 0.15 | 2.88 | 22.3 | 19.9 | 0.3 | 2.6  | 333.7 |
|              | ESP Wood short | 1614   | -0.43           | 10.8 | 0.51              | 0.97 | 0.28 | 4.56 | 18.3 | 17.3 | 0.5 | 4.2  | 311.1 |
| ESI negative | Car fresh      | 366    | -1.34           | 3.1  | 0.07              | 1.84 | 0.25 | 3.76 | 20.6 | 37.4 | 0.3 | 4.6  | 367.2 |
|              | Car short      | 1554   | 0.21            | 6.0  | 0.12              | 1.32 | 0.77 | 6.47 | 12.6 | 16.6 | 1.3 | 9.2  | 334.9 |
|              | Car medium     | 3358   | 0.27            | 6.8  | 0.14              | 1.28 | 0.77 | 6.45 | 13.8 | 17.5 | 1.5 | 10.1 | 370.5 |
|              | Wood fresh     | 1055   | -0.51           | 11.4 | 0.48              | 1.04 | 0.26 | 4.29 | 20.8 | 21.2 | 0.3 | 4.9  | 357.3 |
|              | Wood short     | 2614   | 0.27            | 10.9 | 0.43              | 0.91 | 0.59 | 7.70 | 16.7 | 14.3 | 0.8 | 8.8  | 367.7 |
|              | Wood medium    | 2050   | 0.48            | 9.7  | 0.36              | 0.95 | 0.72 | 9.31 | 15.4 | 14.0 | 0.5 | 10.1 | 370.9 |
|              | ESP Wood fresh | 1282   | -0.33           | 12.7 | 0.53              | 0.92 | 0.29 | 5.32 | 20.7 | 18.6 | 0.6 | 5.5  | 367.0 |
|              | ESP Wood short | 2703   | 0.25            | 10.5 | 0.41              | 0.94 | 0.59 | 7.48 | 16.5 | 14.8 | 0.8 | 8.8  | 367.9 |
| ESI positive | Car fresh      | 797    | -1.33           | 3.7  | 0.11              | 1.77 | 0.23 | 2.93 | 18.7 | 32.4 | 0.3 | 3.7  | 340.2 |
|              | Car short      | 1721   | -0.65           | 3.8  | 0.06              | 1.66 | 0.51 | 4.56 | 13.2 | 22.1 | 1.1 | 6.1  | 302.3 |
|              | Car medium     | 1125   | -0.76           | 8.6  | 0.33              | 1.26 | 0.27 | 3.93 | 18.7 | 22.8 | 0.6 | 4.3  | 344.0 |
|              | Wood fresh     | 454    | -0.49           | 12.3 | 0.57              | 0.90 | 0.22 | 4.76 | 19.7 | 17.1 | 0.3 | 3.5  | 333.5 |
|              | Wood short     | 1672   | -0.44           | 9.6  | 0.45              | 1.06 | 0.32 | 4.01 | 16.6 | 16.5 | 0.5 | 4.5  | 305.4 |
|              | Wood medium    | 1714   | -0.23           | 9.1  | 0.41              | 1.08 | 0.43 | 5.17 | 15.8 | 15.8 | 0.5 | 5.9  | 316.8 |
|              | ESP Wood fresh | 1578   | -0.61           | 10.7 | 0.46              | 1.07 | 0.25 | 3.71 | 19.1 | 19.5 | 0.7 | 4.0  | 341.6 |
|              | ESP Wood short | 1654   | -0.57           | 7.3  | 0.33              | 1.28 | 0.36 | 4.12 | 15.5 | 19.1 | 0.6 | 4.8  | 301.9 |

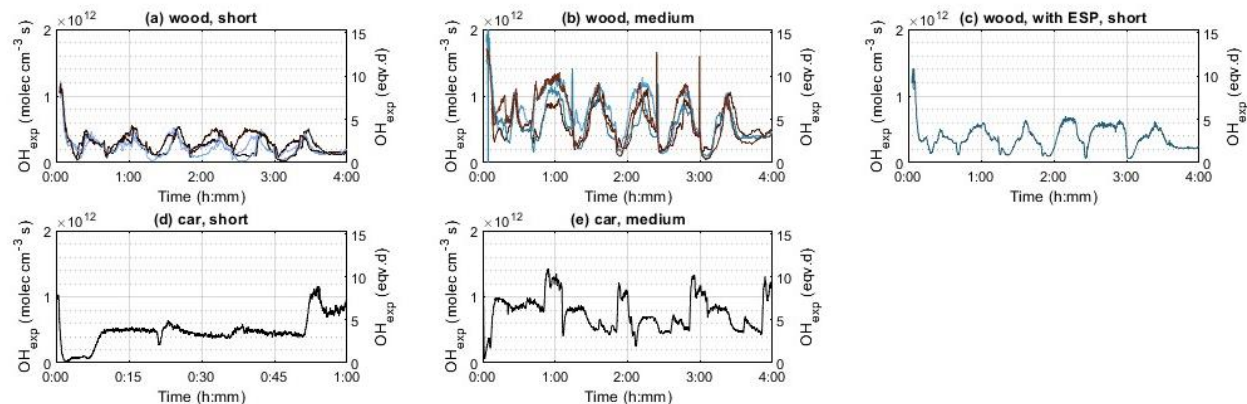

**Figure S1:** OH exposure during the experiments, assessed from the consumption of externally input d9-butanol. For the car experiments, d9-butanol was monitored only for one 1h cycle (short aging, d) experiment or for one 4 h experiment, consisting of four repetitive cycles (medium aging, e).

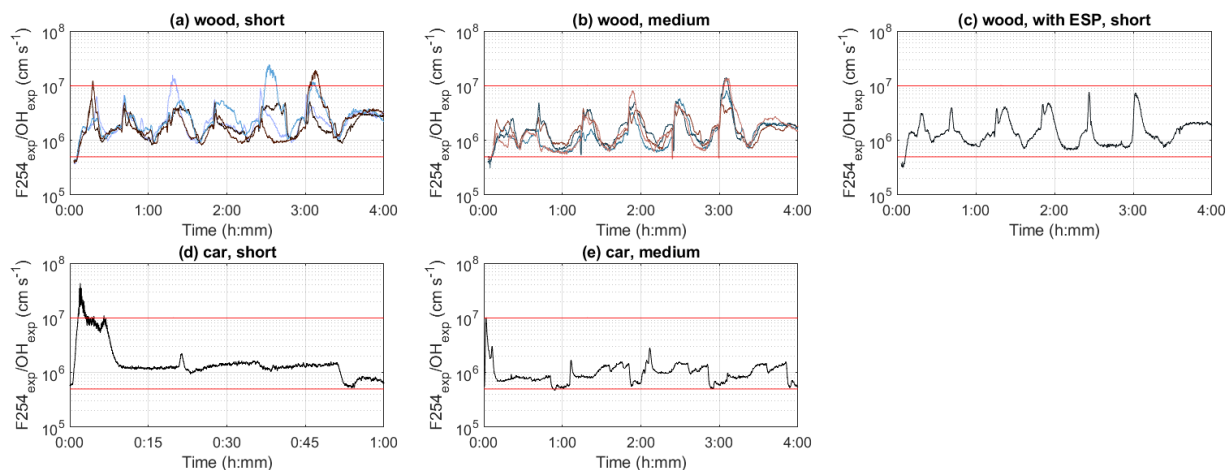

**Figure S2:** Ratio of photolysis ( $F_{254, \text{exp}}$ ) to OH exposure ( $\text{OH}_{\text{exp}}$ ) during the experiments. Ratios of  $4 \times 10^5 \text{ cm s}^{-1}$  and  $1 \times 10^7 \text{ cm s}^{-1}$  are shown as the lower limits for 'risky' and 'bad' oxidative flow reaction conditions, respectively, as defined by Peng and Jimenez.<sup>6</sup>

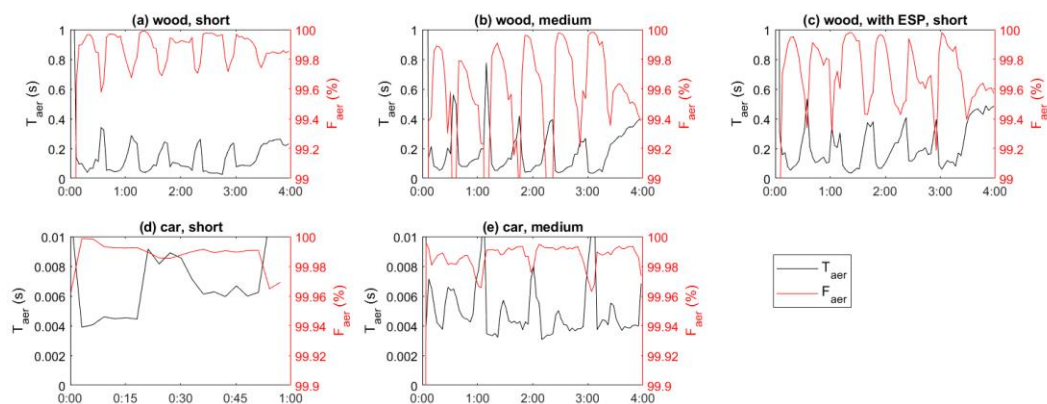

**Figure S3:** Examples of LVOC lifetimes regarding the particulate condensation sinks ( $T_{aer}$ ) downstream the PEAR, and the fraction of LVOCs estimated to have condensed onto particles within their residence in the PEAR ( $F_{aer}$ ) in short and medium aged wood combustion experiments (a and b, respectively), wood combustion with ESP (c), and in the short and medium aged car experiments (d and e, respectively). LVOC fates were modelled similarly to Hartikainen et al. and Palm et al. based on particle size distributions measured after the PEAR.<sup>7,8</sup>



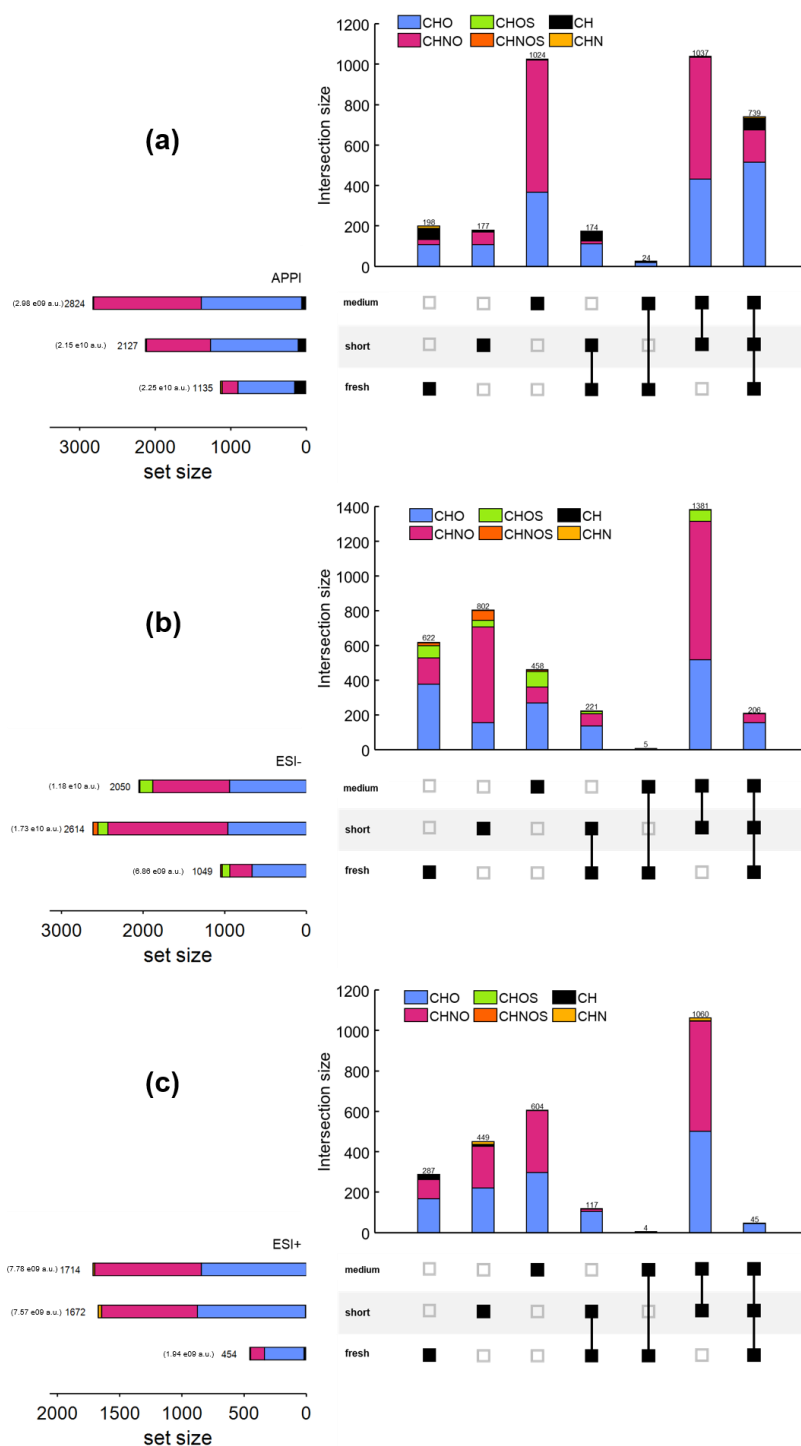

**Figure S4:** Upset plots of assigned elemental compositions from fresh, short aged and medium aged residential wood combustion emissions with indicated compound class, detected in **(a)** APPI **(b)** ESI- and **(c)** ESI+. Upset plots are used to visualize the number as well as chemical composition within each intersect of a Venn diagram. The black squares underneath each plot indicate which intersection of datasets is addressed by the respective bar. TIC (set size) is indicated in brackets behind the respective number of compounds in each dataset.

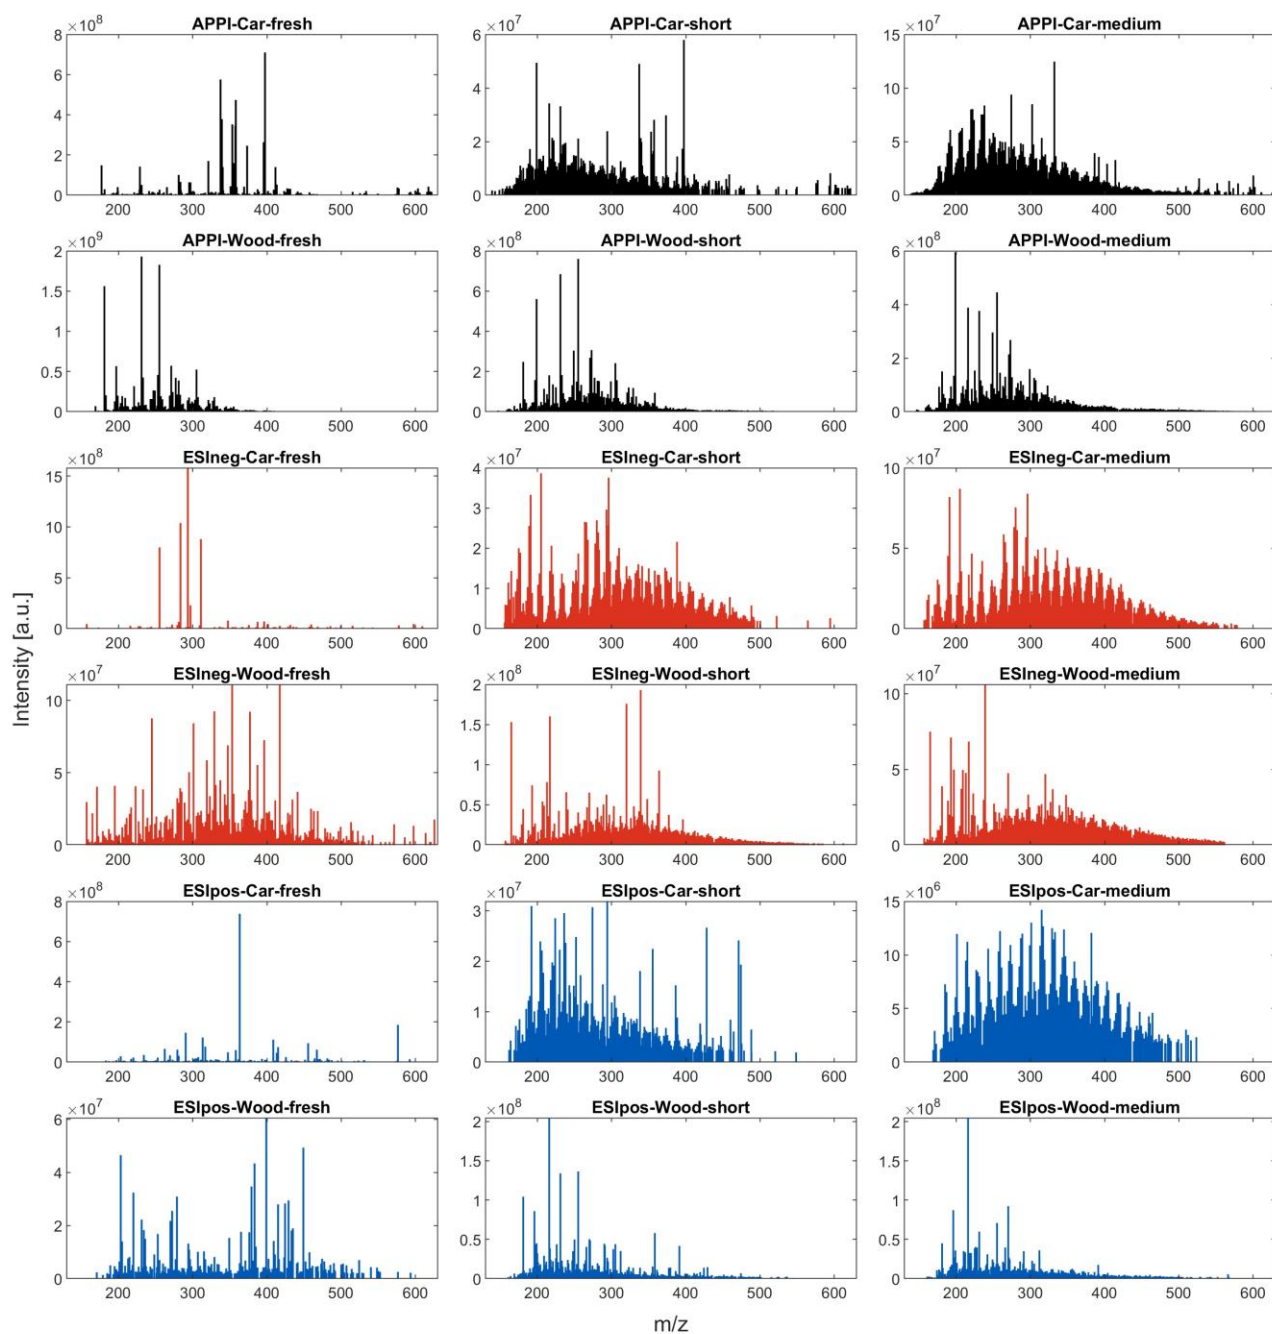

**Figure S5:** Overview of total assigned mass spectra of each emission source (gasoline car, wood combustion) and intensity of photochemical aging (fresh, short, medium) in each applied ionization technique (APPI: black, ESI-: red, ESI+: blue).

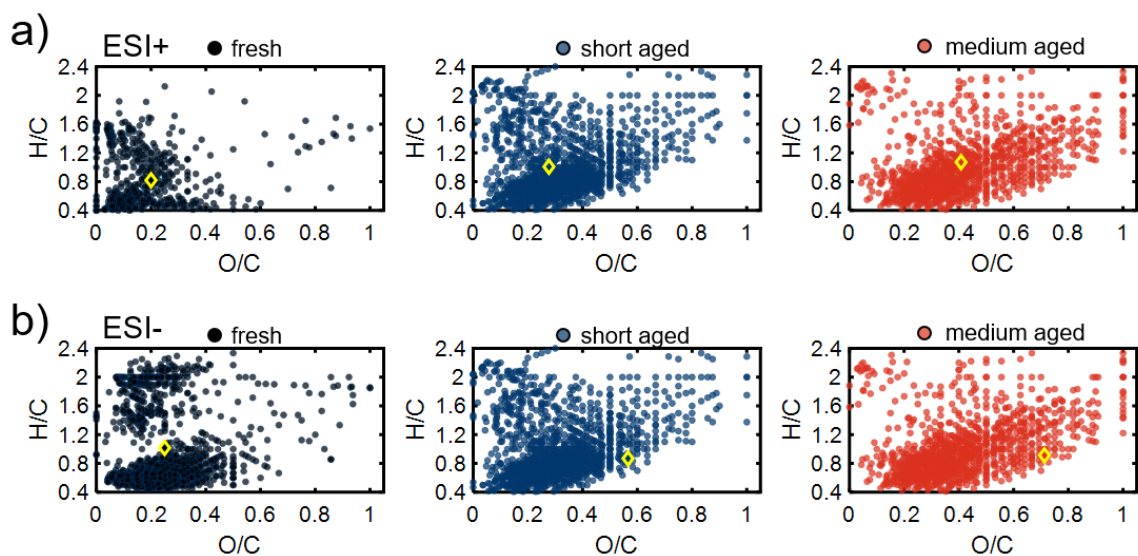

**Figure S6:** Van Krevelen diagrams of residential wood combustion emissions **(a)** ESI+ and **(b)** ESI- data with fresh organic aerosol indicated in black (left) and compounds newly formed during short aging (center) indicated in blue and compounds only formed during medium aging (right) displayed in red. The dot size indicates the number of oxygen atoms in the sum formula.

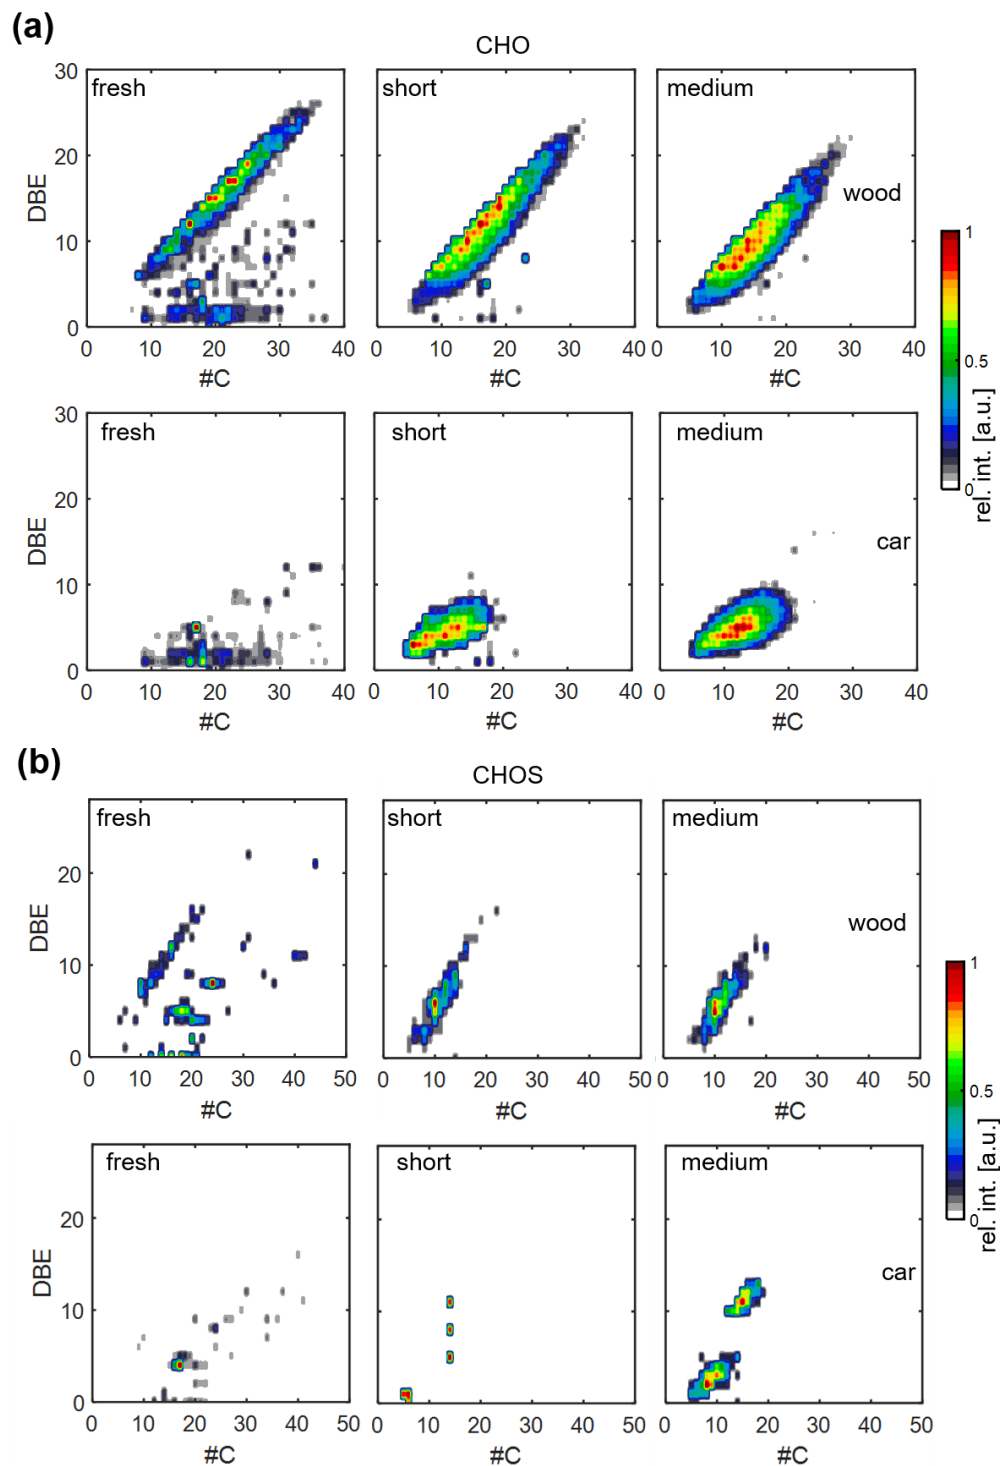

**Figure S7:** Contour plot of double bond equivalent (DBE) versus carbon number plot of the (a) CHO and (b) CHOS compound class in fresh, short aged and medium aged ESI- data of residential wood combustion emissions (top) and gasoline car emissions (bottom).

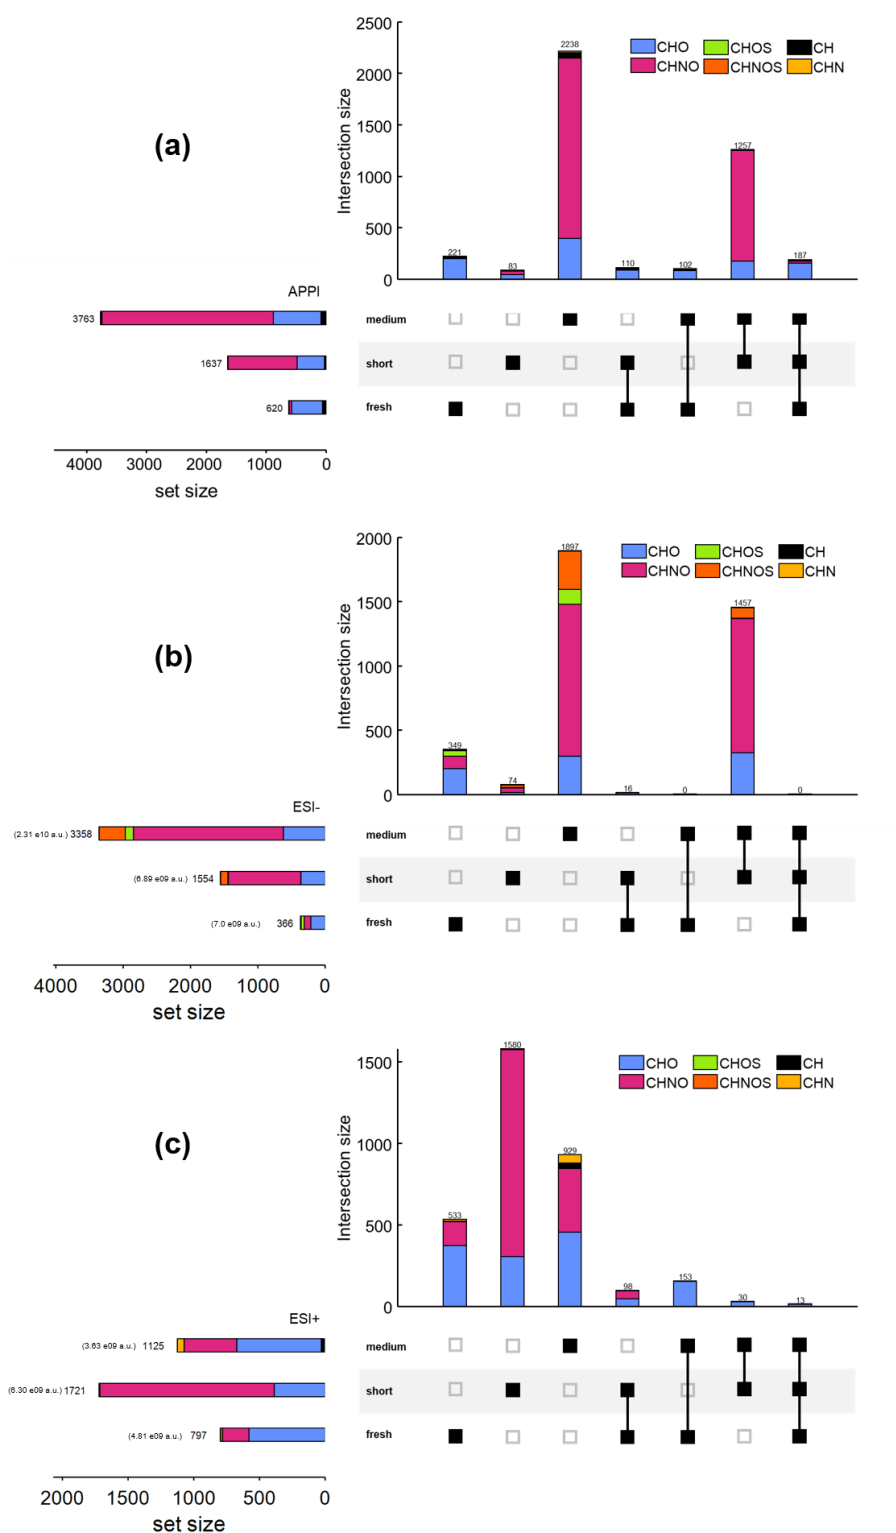

**Figure S8:** Upset plots of assigned elemental compositions from fresh and short aged residential wood combustion emissions with optional application of an electrostatic precipitator (ESP) and with indicated compound class, detected in **(a)** APPI **(b)** ESI- and **(c)** ESI+. TIC (set size) is indicated in brackets behind the respective number of compounds in each dataset.

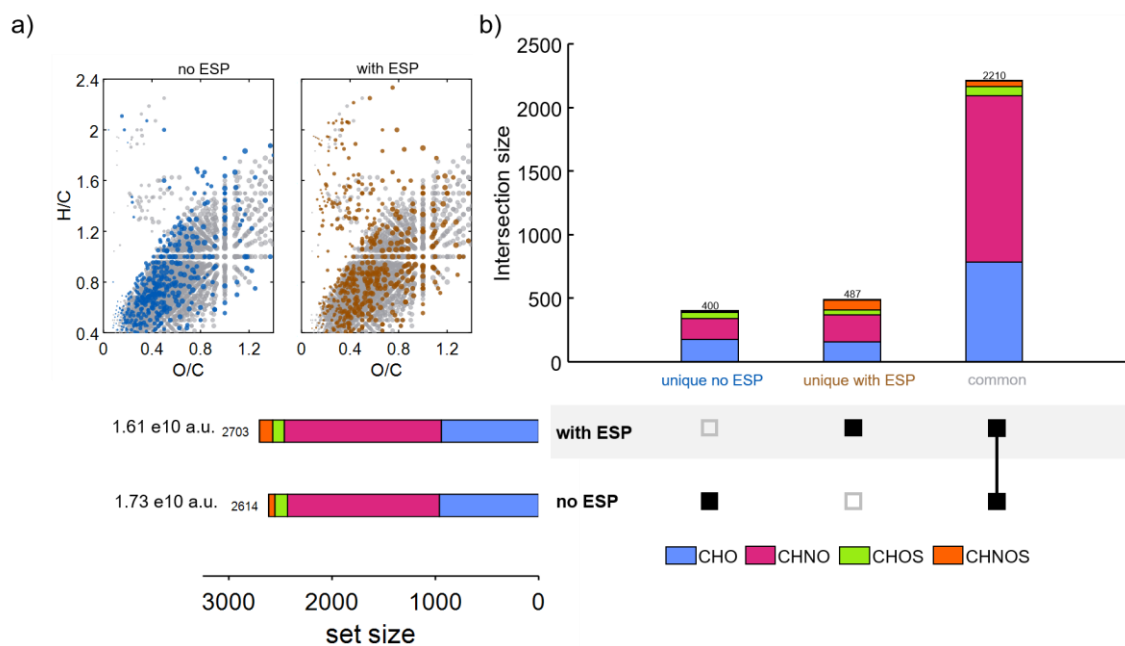

**Figure S9:** Upset plot of short aged wood combustion emissions (ESI-) with and without application of an electrostatic precipitator (ESP) showing unique and common elemental compositions of the two experiments. Van Krevelen diagrams (top left) showing the distribution of compounds found only in the short aging emissions without ESP (blue), with ESP (brown), or in both (grey). TIC (set size) is indicated in brackets behind the respective number of compounds in each dataset.

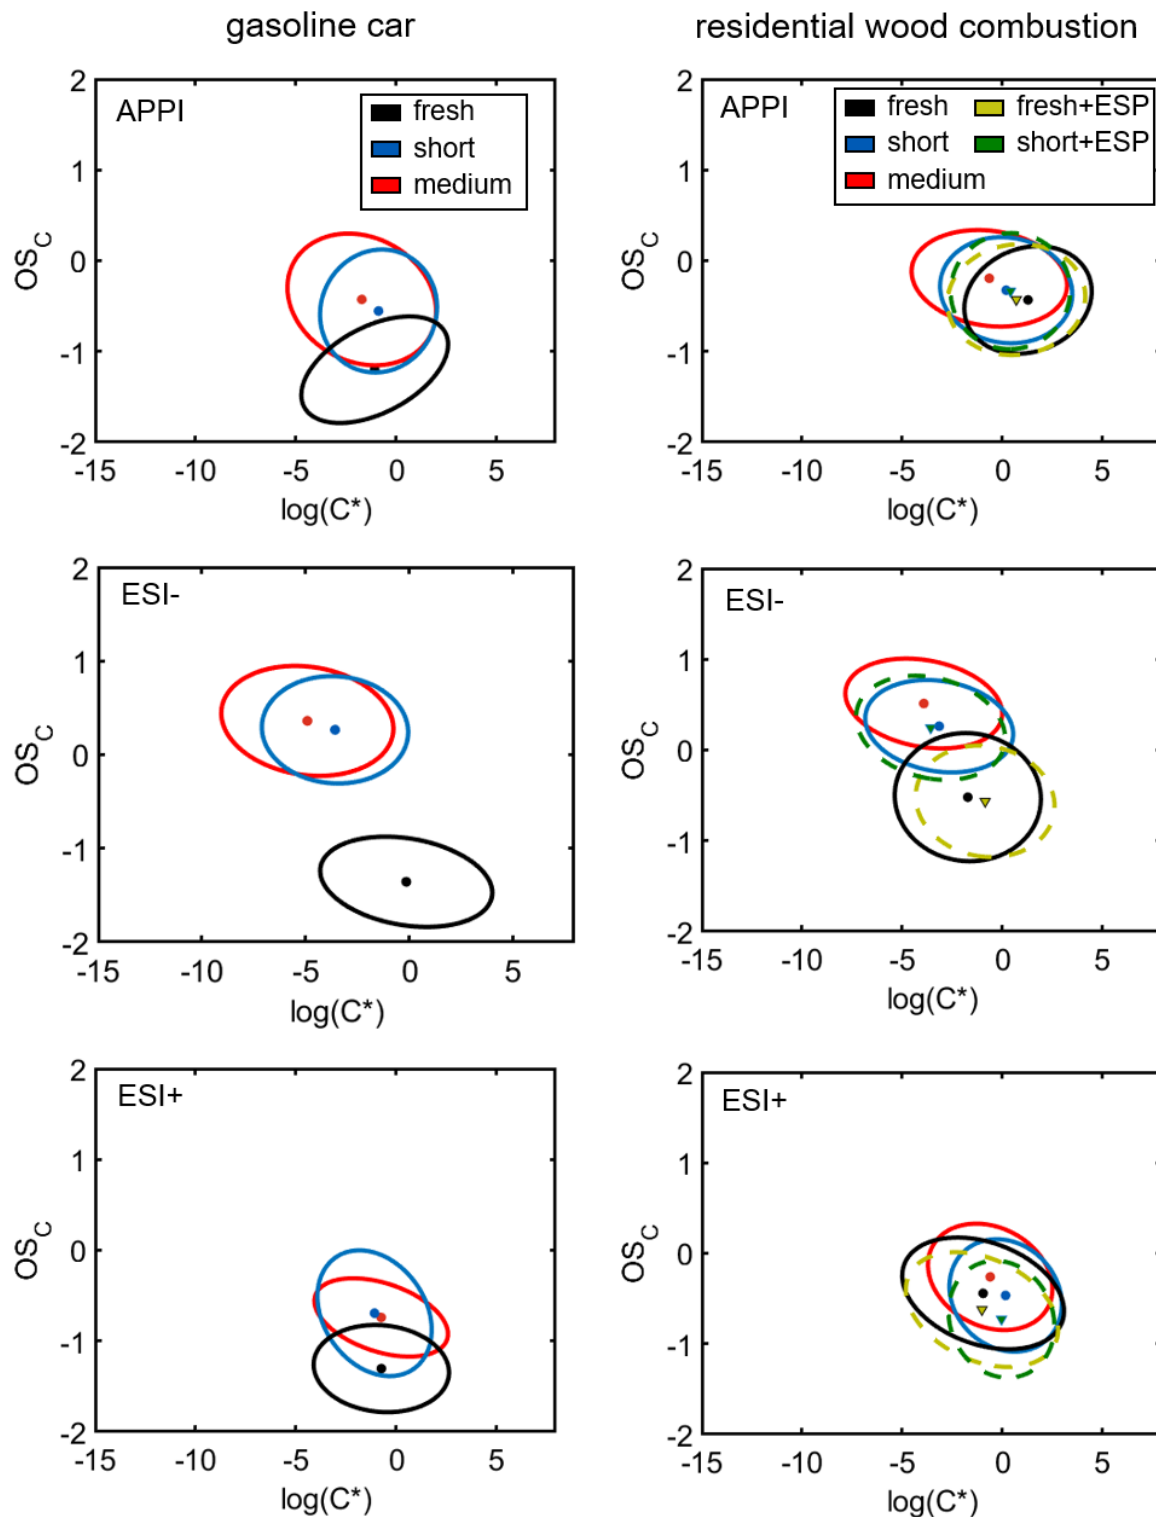

**Figure S10:** Average carbon oxidation state ( $OS_C$ ) versus saturation vapor pressure ( $\log(C^*)$ ) plots of gasoline car (left) and residential wood combustion (right) emissions separated by ionization method, with intensity weighted mean values (dots) and ellipses indicating the 50% confidence interval of the  $\log(C^*)$  versus  $OS_C$  distribution. Fresh emissions are indicated in black, short aged in blue and medium aged in red. Fresh and short aged wood combustion emissions with application of an electrostatic precipitator (ESP) are indicated by triangles (green) with dotted lines indicating the respective confidence interval.

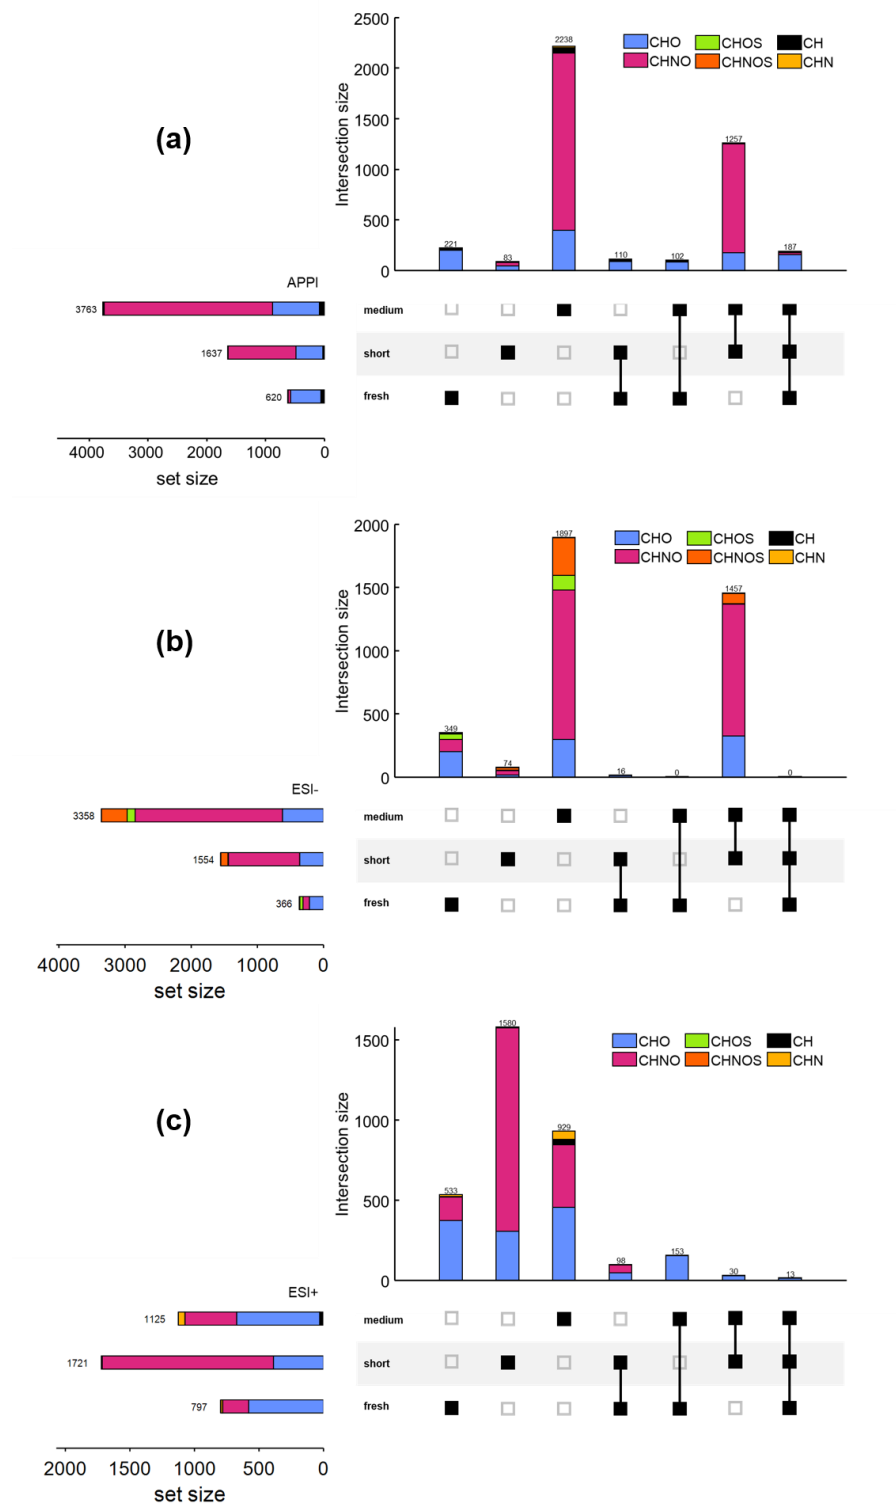

**Figure S11:** Upset plots of assigned elemental compositions from fresh, short aged and medium aged gasoline car emissions with indicated compound class, detected in **(a)** APPI **(b)** ESI- and **(c)** ESI+. TIC (set size) is indicated in brackets behind the respective number of compounds in each dataset.



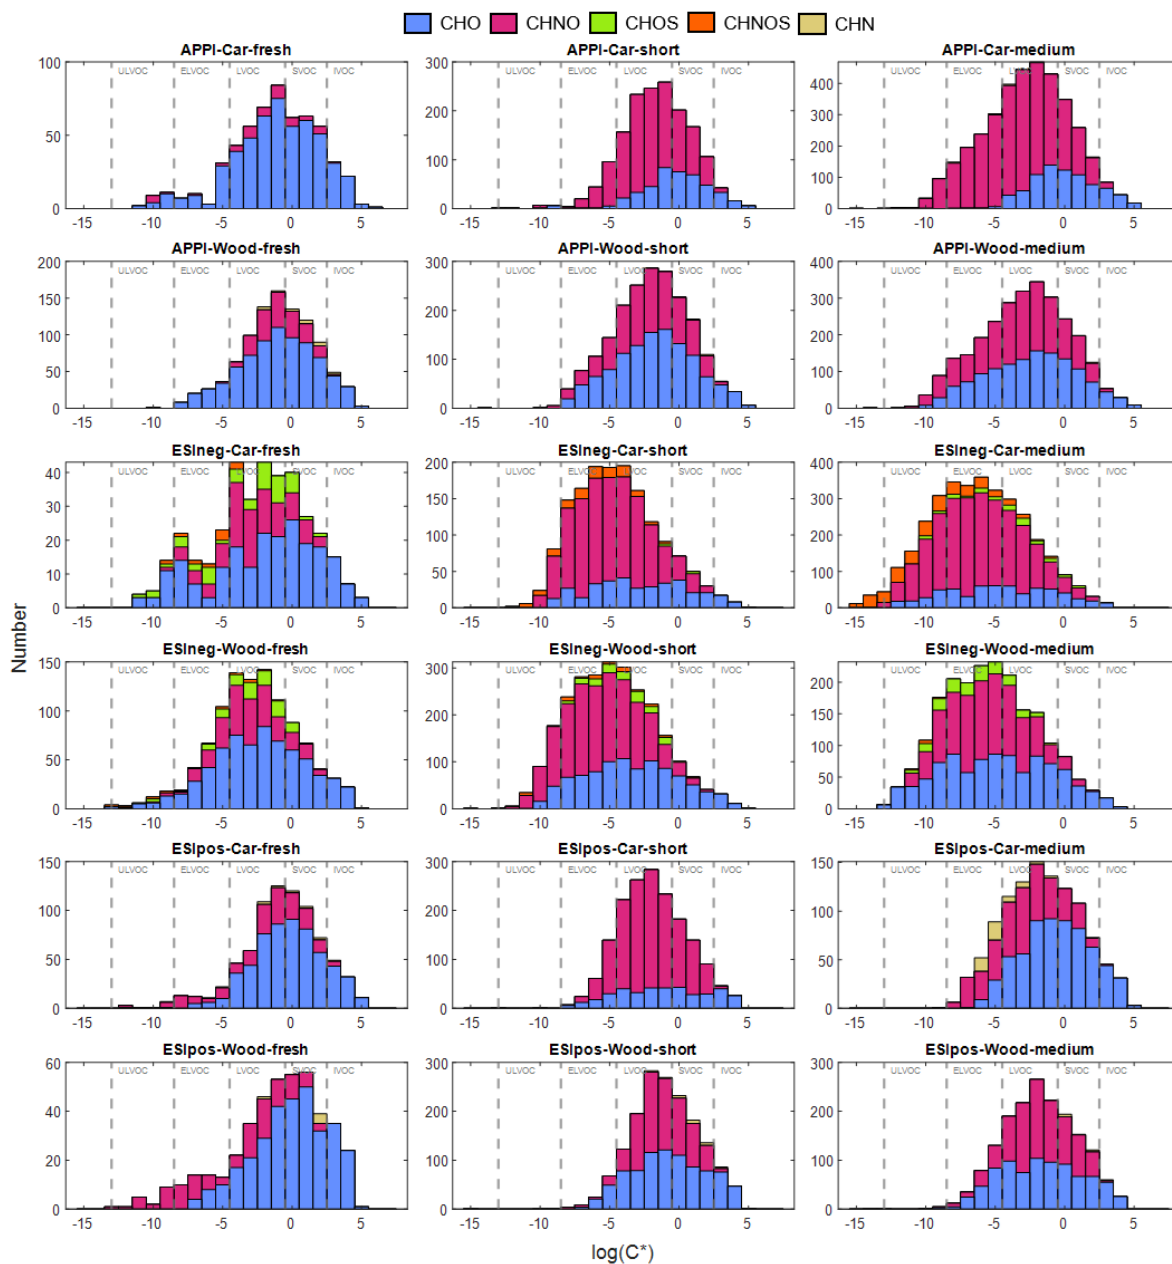

**Figure S12:** Distribution of compound classes (number) in separated volatility bins ( $\log(C^*)$ ) for each ionization technique, emission source and intensity of photochemical aging. Organic compound volatility ranges of intermediate volatile (IVOC), semi volatile (SVOC), low-volatile (LVOC) extremely-low volatile (ELVOC) and ultra-low volatile (ULVOC) are indicated by dotted vertical lines.

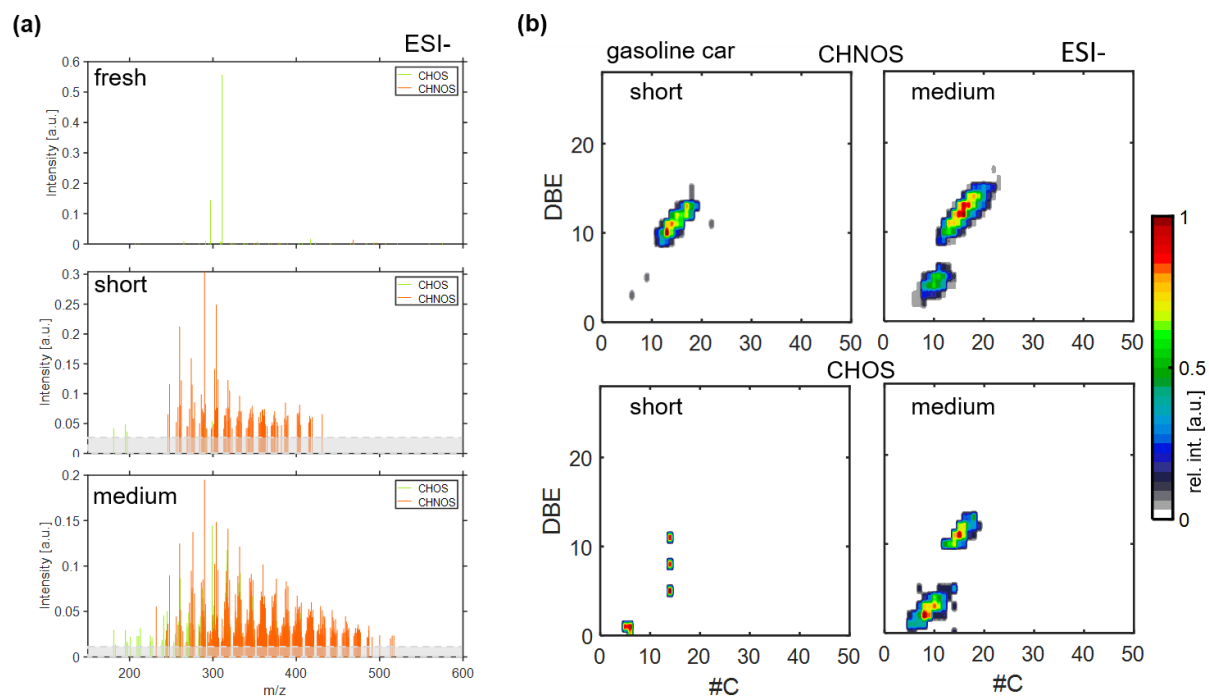

**Figure S13:** (a) Mass spectra (ESI-) of assigned sulfur-containing elemental compositions (CHOS: green, CHNOS: orange) in fresh, short aged and medium aged gasoline car emissions. The grey area indicates the signal-to-noise threshold for peak picking. (b) Contour plot of double bond equivalent (DBE) versus carbon number plot of the CHNOS (top) and CHOS (bottom) compound class in short and medium aged ESI(-) data of gasoline car emissions.

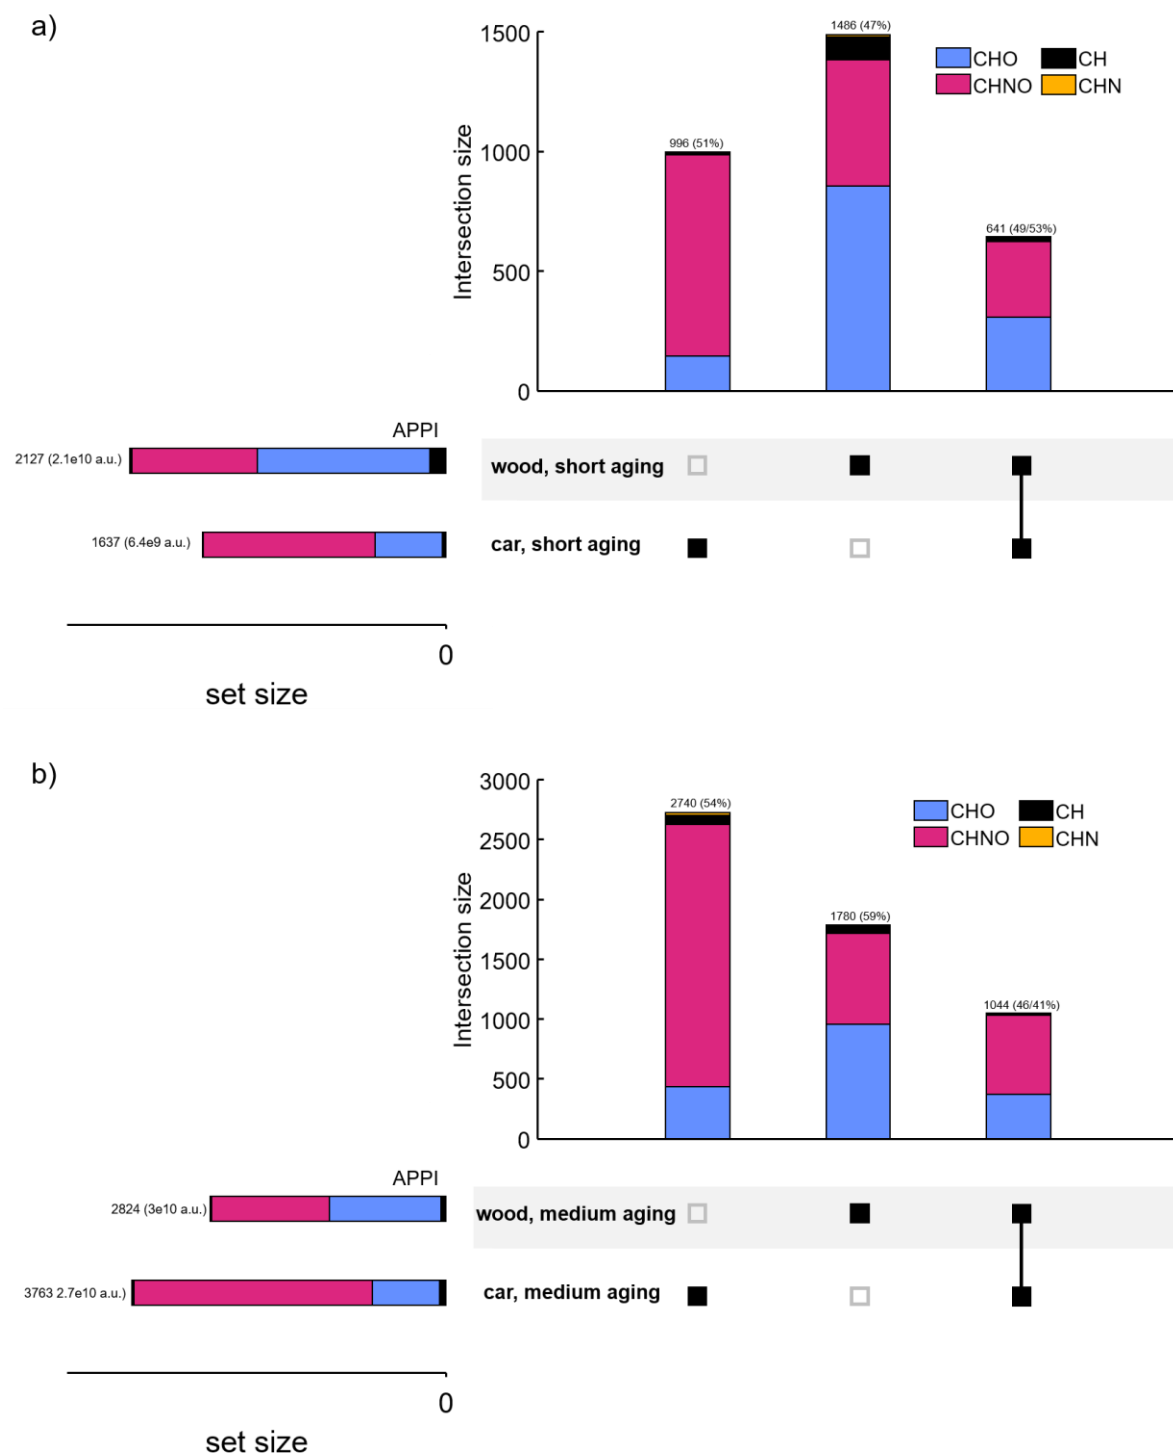

**Figure S14:** Upset plots of the comparison of gasoline car and residential wood combustion emission aging after **a)** short and **b)** medium aging. Relative compound class number distribution indicated by color. TIC (set size) or relative intensity (intersection size) is indicated in brackets behind the respective number of compounds in each intersection or the total number of compounds in each dataset.

## References

- 1 J. H. Kroll, N. M. Donahue, J. L. Jimenez, S. H. Kessler, M. R. Canagaratna, K. R. Wilson, K. E. Altieri, L. R. Mazzoleni, A. S. Wozniak, H. Bluhm, E. R. Mysak, J. D. Smith, C. E. Kolb and D. R. Worsnop, Carbon oxidation state as a metric for describing the chemistry of atmospheric organic aerosol, *Nat. Chem.*, 2011, **3**, 133–139.
- 2 B. P. Koch and T. Dittmar, From mass to structure: an aromaticity index for high-resolution mass data of natural organic matter, *Rapid Commun. Mass Spectrom.*, 2006, **20**, 926–932.
- 3 Y. Li, U. Pöschl and M. Shiraiwa, Molecular corridors and parameterizations of volatility in the chemical evolution of organic aerosols, *Atmos. Chem. Phys.*, 2016, **16**, 3327–3344.
- 4 Y. Li, U. Pöschl and M. Shiraiwa, Molecular corridors and parameterizations of volatility in the chemical evolution of organic aerosols, *Atmos. Chem. Phys.*, 2016, **16**, 3327–3344.
- 5 N. M. Donahue, S. A. Epstein, S. N. Pandis and A. L. Robinson, A two-dimensional volatility basis set: 1. organic-aerosol mixing thermodynamics, *Atmos. Chem. Phys.*, 2011, **11**, 3303–3318.
- 6 Z. Peng and J. L. Jimenez, Modeling of the chemistry in oxidation flow reactors with high initial NO, *Atmos. Chem. Phys.*, 2017, **17**, 11991–12010.
- 7 A. Hartikainen, P. Tiitta, M. Ihalainen, P. Yli-Pirilä, J. Orasche, H. Czech, M. Kortelainen, H. Lamberg, H. Suhonen, H. Koponen, L. Hao, R. Zimmermann, J. Jokiniemi, J. Tissari and O. Sippula, Photochemical transformation of residential wood combustion emissions: dependence of organic aerosol composition on OH exposure, *Atmos. Chem. Phys.*, 2020, **20**, 6357–6378.
- 8 B. B. Palm, P. Campuzano-Jost, A. M. Ortega, D. A. Day, L. Kaser, W. Jud, T. Karl, A. Hansel, J. F. Hunter, E. S. Cross, J. H. Kroll, Z. Peng, W. H. Brune and J. L. Jimenez, In situ secondary organic aerosol formation from ambient pine forest air using an oxidation flow reactor, *Atmos. Chem. Phys.*, 2016, **16**, 2943–2970.
